# Supplementary material for: A Carboxyethylchitosan Gel Cross-Linked with Glutaraldehyde as a Candidate Carrier for Biomedical Applications
Source: MDPI journal article supplement (doi:10.3390/gels9090756), 2023-09-16
Supplement: s1 [file s1]

# Supplementary Materials: A Carboxyethylchitosan Gel Cross-Linked with Glutaraldehyde as a Candidate Carrier for Biomedical Applications

Anastasia Korel <sup>1</sup>, Alexander Samokhin <sup>1,\*</sup>, Ekaterina Zemlyakova <sup>2</sup>, Alexander Pestov <sup>2</sup>, Elena Blinova <sup>1</sup>, Maxim Zelikman <sup>3</sup>, Vadim Tkachenko <sup>4</sup>, Viktoria Bets <sup>1</sup>, Svetlana Kretien <sup>1,5</sup>, Elena Arzhanova <sup>1</sup> and Ekaterina Litvinova <sup>1</sup>

<sup>1</sup> Novosibirsk State Technical University, Faculty of physical engineering, 630073 Novosibirsk, Russia; ako-rel@gmail.com (A.K.); blinovaelena-85@yandex.ru (E.B.); vish22@yandex.ru (V.B.); ssonovo64@inbox.ru (S.K.); e.arzhanova@nsu.ru (E.A.); dimkit@mail.ru (E.L.)

<sup>2</sup> Institute of Organic Synthesis n.a. I. Ya. Postovsky UB RAS, 620137 Ekaterinburg, Russia; kottazem@mail.ru (E.Z.); pestov@ios.uran.ru (A.P.)

<sup>3</sup> Institute of Solid State Chemistry and Mechanochemistry SB RAS, 630090 Novosibirsk, Russia; zelikman\_mv@mail.ru

<sup>4</sup> Institute of Nuclear Physics SB RAS, 630090 Novosibirsk, Russia; vtachen@mail.ru

<sup>5</sup> Novosibirsk Research Institute of Traumatology and Orthopedics, 630091 Novosibirsk, Russia

\* Correspondence: motorist@inbox.ru

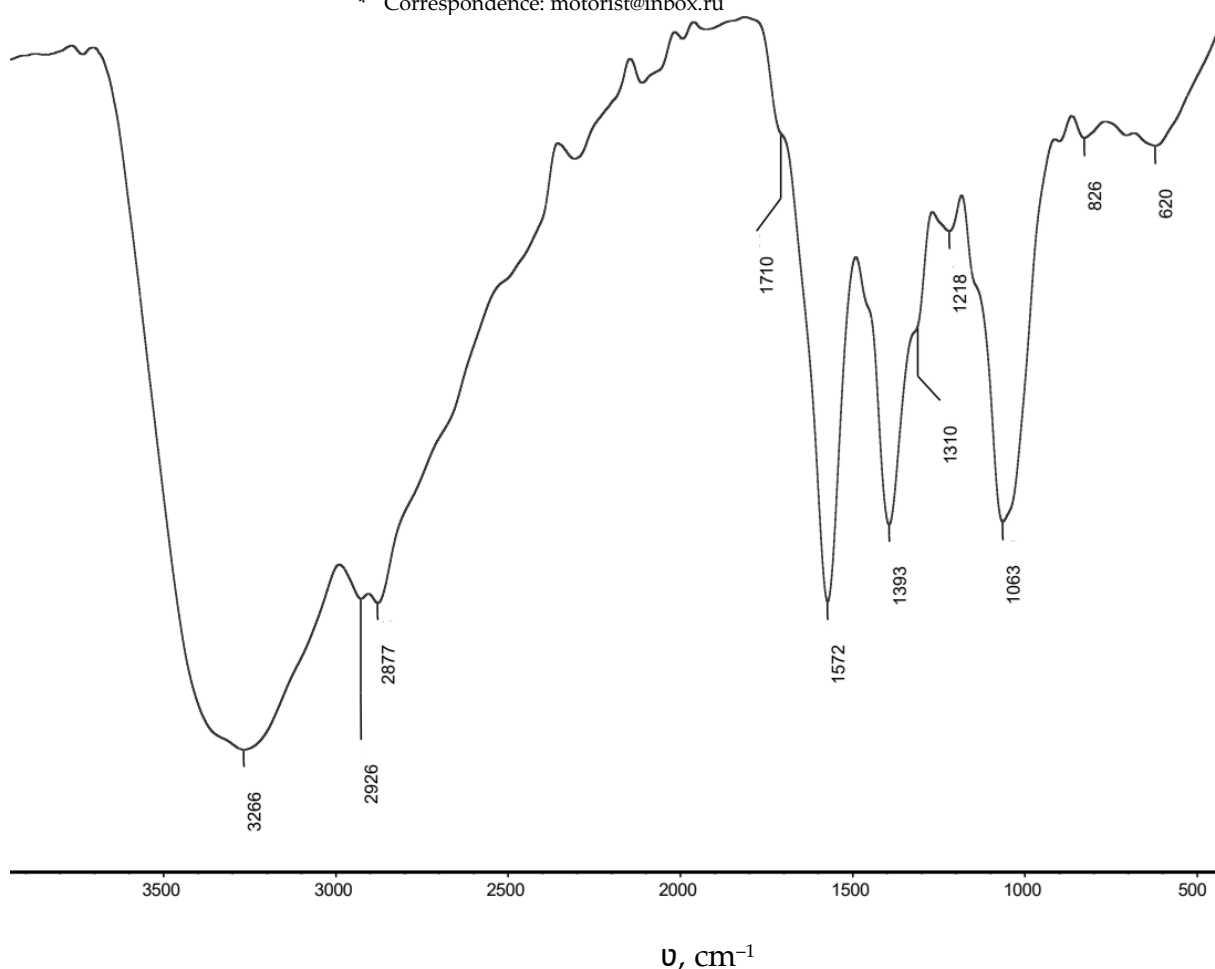

**Figure S1.** FT-IR spectrum of N-(2-carboxyethyl)chitosan.
